# Supplementary material for: Schizandrin Protects against OGD/R-Induced Neuronal Injury by Suppressing Autophagy: Involvement of the AMPK/mTOR Pathway
Source: MDPI journal article supplement (doi:10.3390/molecules24193624), 2019-10-08
Supplement: s1 [file s1]

Figure S1

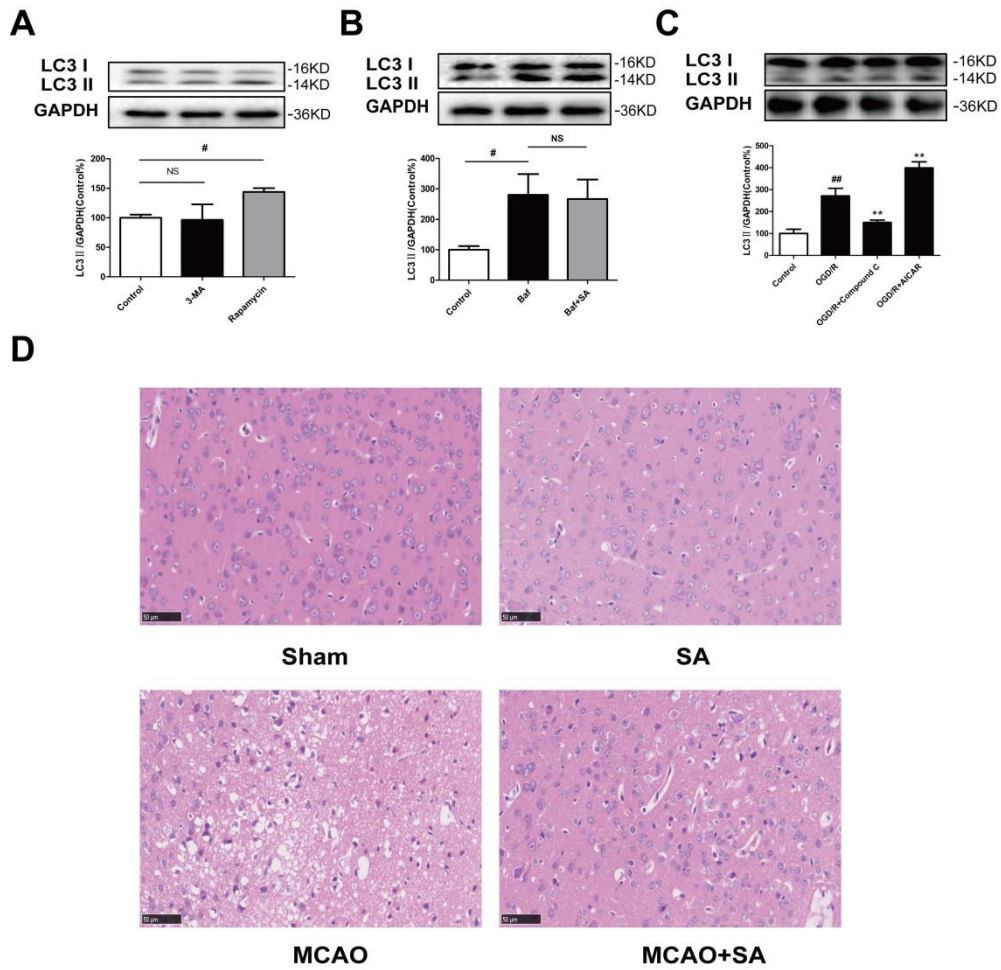

Figure S1. LC3 expression in PC12 cells. (A) PC12 cells were treated with rapamycin or 3-MA and then exposed to OGD/R; (B) PC12 cells were treated with baf or SA and then exposed to OGD/R; (C) PC12 cells were treated with compound C or AICAR and then exposed to OGD/R; Then the expressiona of LC3 were detected by western blot (n=3). (D) HE staining showing the morphological characteristics of mouse brains upon MCAO/R. Bar: 50  $\mu$ m. All data are mean  $\pm$ SD.  $^{##}P < 0.01$  vs. control group;  $^{*}P < 0.05$  and  $^{**}P < 0.01$  vs. OGD/R group.
